# Supplementary material for: VirSorter: mining viral signal from microbial genomic data
Source: PeerJ. 2015 May 28;3:e985. doi: 10.7717/peerj.985 (PMC4451026; doi:10.7717/peerj.985)
Supplement: Figure S1 [file peerj-03-985-s002.pdf]

# Running VirSorter in iPlant Discovery Environment

## 1. iPlant Registration

To access VirSorter on iPlant, you will first need to create a (free) account. This can be done at this address: <https://user.iplantcollaborative.org/register/> (help can be found at <https://pods.iplantcollaborative.org/wiki/display/start/Registering+for+and+Managing+your+iPlant+Account>).

## 2. Login to the Discovery Environment

The Discovery Environment is the section of iPlant hosting VirSorter, and can be found at <https://de.iplantcollaborative.org/de/>

## 3. Upload your data

The screenshot shows the 'Discovery Environment' web interface in a Mozilla Firefox browser. On the left sidebar, the 'Data' tab is selected, indicated by an arrow and the text 'In the data tab'. Below it, another arrow points to the 'Data' icon with the text 'select a directory to work into'. A third arrow points to the 'VirSorter' directory in the file list with the text 'and upload your genome(s) / metagenome(s) in fasta format'. The main window displays a file explorer for the 'VirSorter' directory, showing a list of files and folders. A 'Details' panel on the right shows the selected file's information.

## 4. Select VirSorter parameters and launch the computation

The screenshot shows the 'Discovery Environment' web interface in a Mozilla Firefox browser. On the left sidebar, the 'Apps' tab is selected, indicated by an arrow and the text 'In the app tab'. Below it, another arrow points to the 'Apps' icon with the text 'select iVirus category'. A third arrow points to the 'iVirus' category in the app list with the text 'then select VirSorter'. The main window displays a list of applications, with 'VirSorter 1.0.2' selected. A configuration window for 'VirSorter 1.0.2' is open, showing various parameters. Arrows point to specific fields with labels: 'Select an output folder' points to the 'Select output folder' field; 'Select an input file and a database (i.e. with or without viromes)' points to the 'Input Fasta file of microbial contig Sequences' and 'Database' fields; 'You can also select a fasta file of additional viral sequences' points to the 'Additional viral sequence to be used as reference (optional)' field; and 'and select the "virome decontamination" mode, designed to identify viral sequences in datasets that are mostly viral (as opposed to the mining of viral signal in microbial genomes or metagenomes)' points to the 'Virome decontamination' checkbox.

5.Retrieve VirSorter results

Notifications will indicate when the job is (i) submitted, (ii) running, and (iii) completed

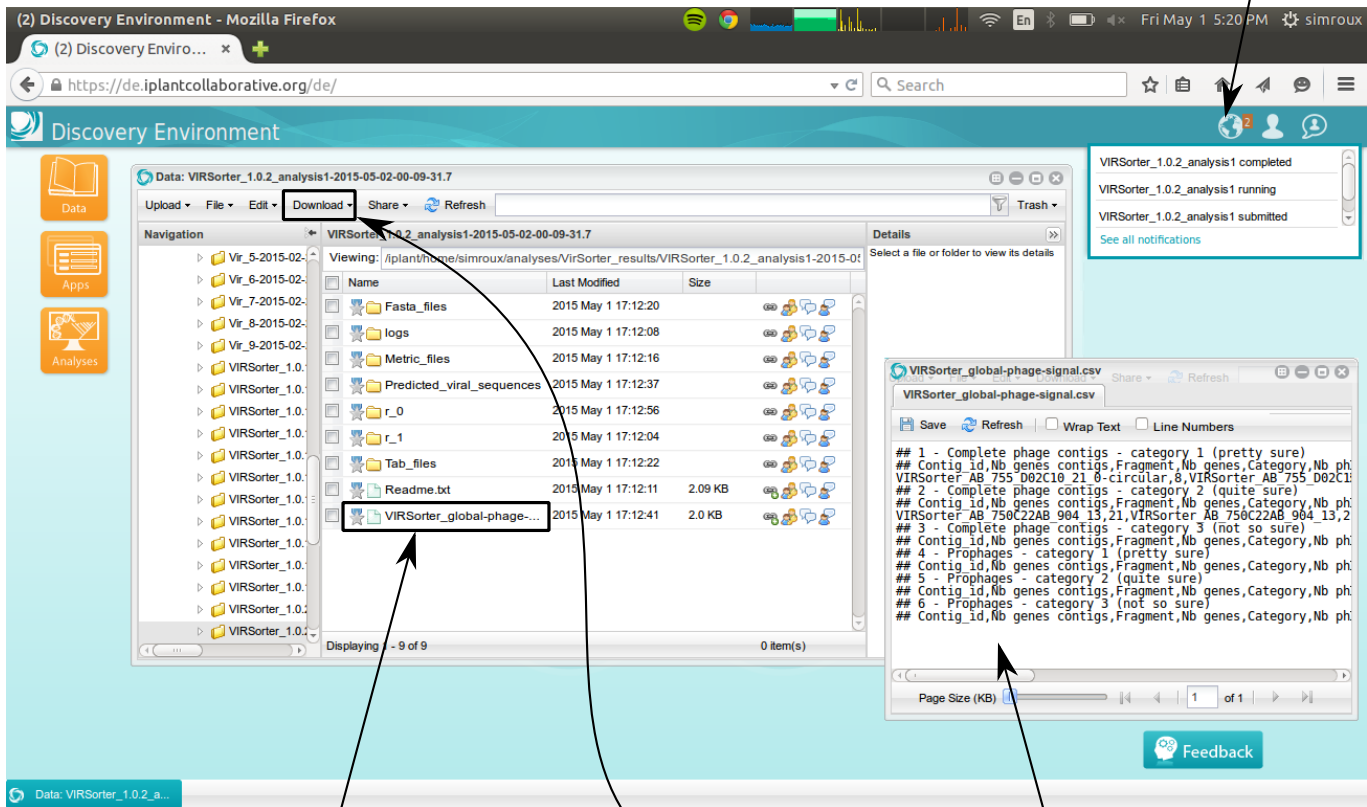

Once completed, the output directory will include the main csv output file, listing all sequences detected as viral with their associated category and metrics, alongside the other result files stored into different sub-directories.

Result files can be opened in the Discovery Environment or downloaded for further processing

See the wiki page of VirSorter for a more complete description of the result files:  
<https://pods.iplantcollaborative.org/wiki/display/DEapps/VIRSorter+1.0.2>
